# Supplementary material for: Solvothermal synthesis, structure and physical properties of Cs[Cr(en)2MSe4] (M = Ge, Sn) with [MSe4]4− tetrahedra as chelating ligand
Source: Royal Society of Chemistry journal article supplement (doi:10.1039/c6dt00233a), 2016-01-01
Supplement: c6dt00233a1.pdf [file c6dt00233a1.pdf]

## Supporting Information

### **Solvothermal Synthesis, Structure and Physical Properties of Cs[Cr(en)<sub>2</sub>MSe<sub>4</sub>] (M = Ge, Sn) with [MSe<sub>4</sub>]<sup>4-</sup> Tetrahedra as Chelating Ligand**

*Yingqi Wang,<sup>†‡</sup> Ruiqi Wang,<sup>‡</sup> Qinglong Liu,<sup>‡</sup> Xiaofang Lai,<sup>‡</sup> Xian Zhang,<sup>‡</sup> Haijie*

*Chen,<sup>⊥</sup> Chong Zheng,<sup>\*§</sup> Jianhua Lin,<sup>‡</sup> Fuqiang Huang<sup>\*‡⊥</sup>*

<sup>†</sup> Department of Materials Science and Engineering, College of Engineering, Peking University, Beijing 100871, P. R. China

<sup>‡</sup> Beijing National Laboratory for Molecular Sciences and State Key Laboratory of Rare Earth Materials Chemistry and Applications, College of Chemistry and Molecular Engineering, Peking University, Beijing 100871, China.

<sup>§</sup> Department of Chemistry and Biochemistry, Northern Illinois University, DeKalb, Illinois 60115, USA.

<sup>⊥</sup> Department CAS Key Laboratory of Materials for Energy Conversion Shanghai Institute of Ceramics, Chinese Academy of Sciences, 1295 Dingxi Road, Shanghai 200050, P.R. China

**Table S1.** Selected Bond Distances (Å) and Angles for Cs[Cr(en)<sub>2</sub>MSe<sub>4</sub>]

| <b>parameter</b> | <b><i>M</i> = Ge</b> | <b>parameter</b> | <b><i>M</i> = Sn</b> |
|------------------|----------------------|------------------|----------------------|
| Cr1-N1           | 2.093(6)             | Cr1-N1           | 2.091(4)             |
| Cr1-N2           | 2.084(6)             | Cr1-N2           | 2.076(5)             |
| Cr1-N3           | 2.103(7)             | Cr1-N3           | 2.112(4)             |
| Cr1-N4           | 2.081(6)             | Cr1-N4           | 2.083(5)             |
| Cr1-Se1          | 2.495(1)             | Cr1-Se1          | 2.518(1)             |
| Cr1-Se2          | 2.520(1)             | Cr1-Se2          | 2.535(1)             |
| Ge1-Se1          | 2.379(1)             | Sn1-Se1          | 2.5518(7)            |
| Ge1-Se2          | 2.371(1)             | Sn1-Se2          | 2.5340(7)            |
| Ge1-Se3          | 2.319(1)             | Sn1-Se3          | 2.5012(7)            |
| Ge1-Se4          | 2.327(1)             | Sn1-Se4          | 2.4891(7)            |
| Cs1-Se1          | 3.5053(9)            | Cs1-Se3          | 3.5506(7)            |
| Cs1-Se2          | 3.5902(9)            | Cs1-Se2          | 3.6290(7)            |
| Cs1-Se4          | 3.598(1)             | Cs1-Se3          | 3.6675(7)            |
| Cs1-Se3          | 3.6228(9)            | Cs1-Se1          | 3.7196(7)            |
| Cs1-Se4          | 3.8404(8)            | Cs1-Se4          | 3.7436(7)            |
| Cs1-Se2          | 3.964(1)             | Cs1-Se1          | 3.8181(8)            |
| Cr1- Ge1         | 3.311(1)             | Cr1- Sn1         | 3.4746(9)            |
| Cr1-Cr1          | 6.065(2)             | Cr1-Cr1          | 6.542(1)             |

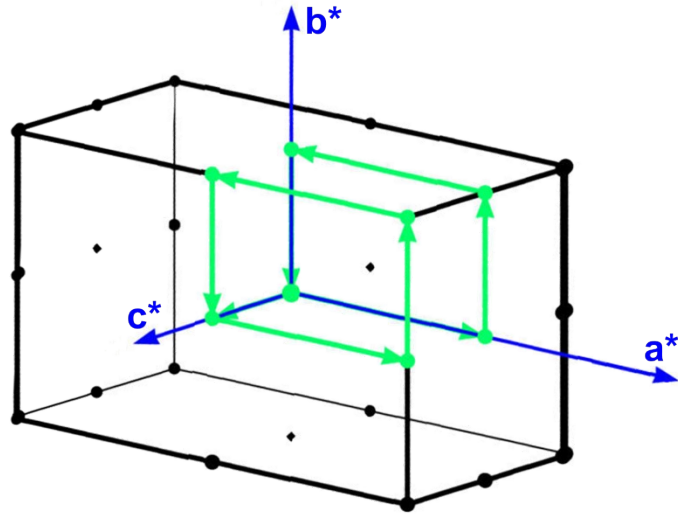

**Figure S1.** The Brillouin zone and k-space pathway for Cs[Cr(en)<sub>2</sub>SnSe<sub>4</sub>]

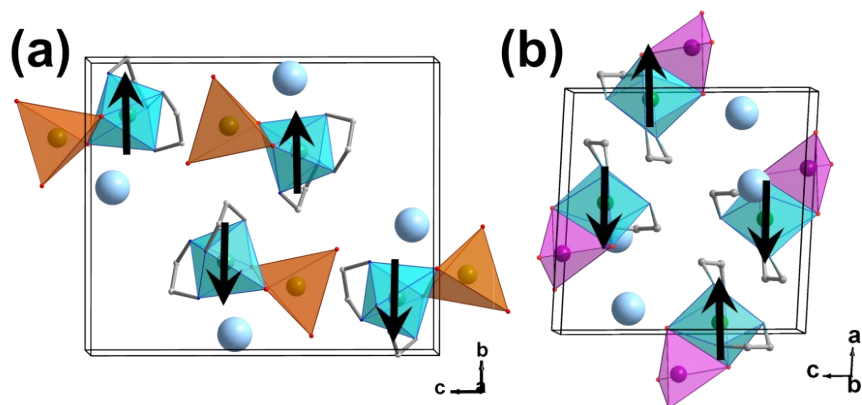

**Figure S2.** Schematic representations of the AFM models for the compound (a)  $\text{Cs}[\text{Cr}(\text{en})_2\text{SnSe}_4]$  and (b)  $\text{Cs}[\text{Cr}(\text{en})_2\text{GeSe}_4]$ . ( $\uparrow$ : spin-up,  $\downarrow$ : spin-down).

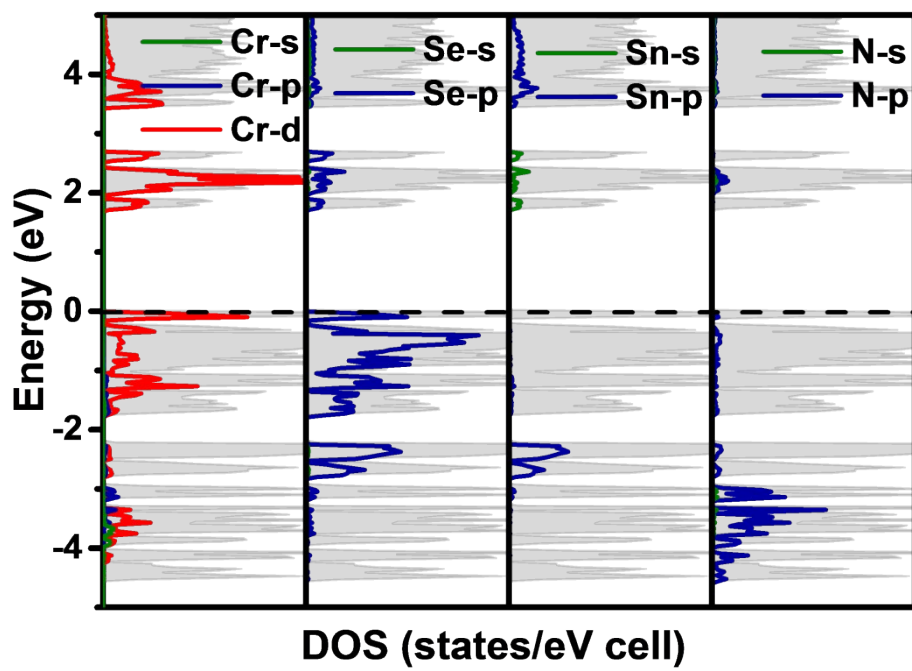

Figure S3. Partial Dos of Cs[Cr(en)<sub>2</sub>SnSe<sub>4</sub>]

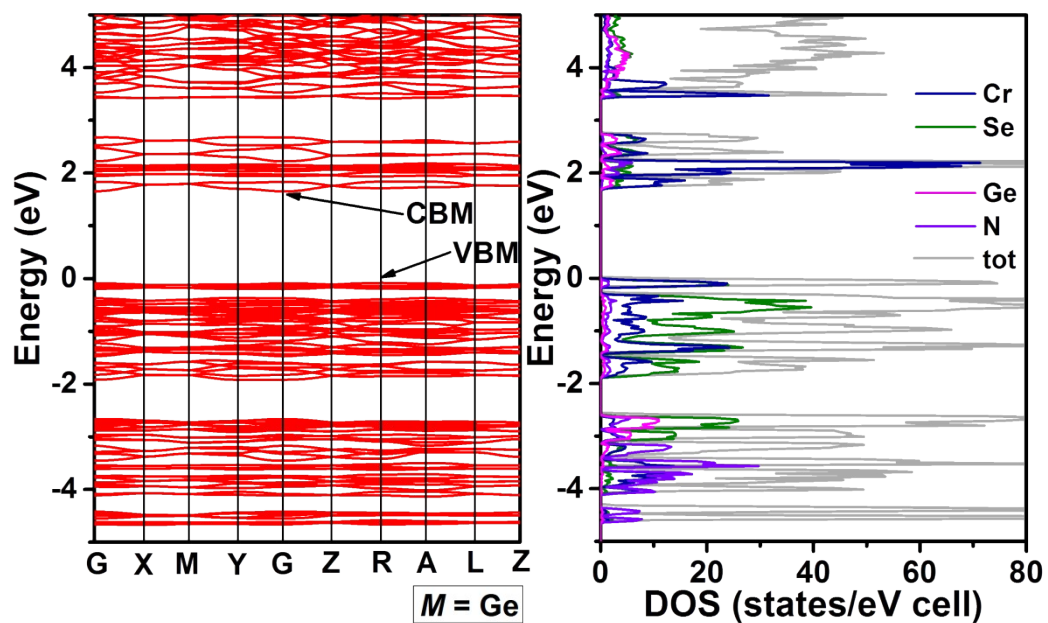

**Figure S4.** Calculated local electronic band structure (left) and partial density of states (right) for  $\text{Cs}[\text{Cr}(\text{en})_2\text{GeSe}_4]$ . (G (0, 0, 0), X (1/2, 0, 0), M (1/2, 1/2, 0), Y (0, 1/2, 0), Z (0, 0, 1/2), R (1/2, 0, 1/2), A (1/2, 1/2, 1/2), L (0, 1/2, 1/2))

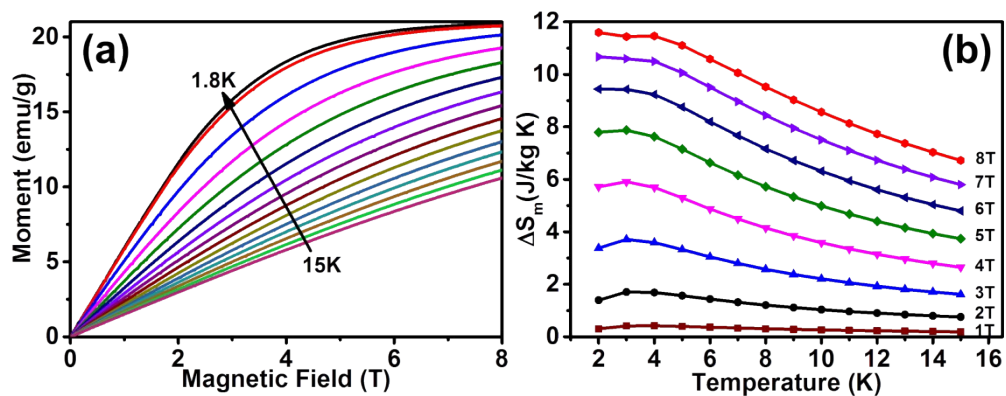

**Figure S5.** Magnetization vs. field for **1** in the temperature range of 1.8–8.2 K. (a)

Field-dependent magnetization plots for Cs[Cr(en)<sub>2</sub>GeSe<sub>4</sub>] at 1.8K, 2K, 3K, 4K, 5K,

6K, 7K, 8K, 9K, 10K, 11K, 12K, 13K, 14K, and 15K. (b)  $\Delta S_m$  calculated by using the

magnetization data of Cs[Cr(en)<sub>2</sub>GeSe<sub>4</sub>] at different fields and temperatures.

**Table S2.** Magnetic Entropy Change for Selected 3*d*-metal Molecule-Based Magnetic

Coolants reported recently

| Compound                                                                                                                                                                                 | $-\Delta S_m$<br>[J/kg K] | $-\Delta S_m$<br>[mJ/cm <sup>3</sup> K] | <i>T</i><br>[K] | $\mu_0\Delta H$<br>[T] | Density<br>[g/cm <sup>3</sup> ] | Ref |
|------------------------------------------------------------------------------------------------------------------------------------------------------------------------------------------|---------------------------|-----------------------------------------|-----------------|------------------------|---------------------------------|-----|
| <b>Cs[Cr(en)<sub>2</sub>SnSe<sub>4</sub>] (this work)</b>                                                                                                                                | 14.2                      | 44.0                                    | 2.0             | 8                      | 3.099                           |     |
| <b>Cs[Cr(en)<sub>2</sub>GeSe<sub>4</sub>] (this work)</b>                                                                                                                                | 11.6                      | 33.4                                    | 2.0             | 8                      | 2.884                           |     |
| Mn <sup>II</sup> <sub>4</sub> (N <sub>3</sub> ) <sub>7.3</sub> Cl <sub>0.7</sub> (dafo) <sub>4</sub>                                                                                     | 19.3                      | 33.3                                    | 4.0             | 5                      | 1.722                           | 1   |
| Fe <sub>14</sub> (bta) <sub>6</sub> O <sub>6</sub> (OMe) <sub>18</sub> Cl <sub>6</sub>                                                                                                   | 17.6                      | 34.0                                    | 6.0             | 7                      | 1.933                           | 2   |
| [Mn <sub>10</sub> (OH) <sub>6</sub> (amp) <sub>4</sub> (ampH) <sub>4</sub> L <sub>4</sub> (EtOH) <sub>4</sub> ]L <sub>4</sub> ·12EtOH                                                    | 17.0                      | 26.2                                    | 5.2             | 7                      | 1.543                           | 3   |
| [Mn <sub>14</sub> (OH) <sub>2</sub> (Hpeol) <sub>4</sub> (H <sub>2</sub> peol) <sub>6</sub> L <sub>4</sub> (EtOH) <sub>6</sub> ]L <sub>4</sub>                                           | 25.0                      | 42.5                                    | 3.8             | 7                      | 1.700                           | 3   |
| Fe <sub>14</sub> O <sub>6</sub> (C <sub>2</sub> H <sub>2</sub> N <sub>3</sub> ) <sub>6</sub> (OMe) <sub>18</sub> Cl <sub>6</sub>                                                         | 20.3                      | 37                                      | 6.0             | 7                      | 1.782                           | 4   |
| [Mn(bpy) <sub>3</sub> ] <sub>1.5</sub> [Mn <sub>32</sub> (thme) <sub>16</sub> (bpy) <sub>24</sub> (N <sub>3</sub> ) <sub>12</sub> (OAc) <sub>12</sub> ](ClO <sub>4</sub> ) <sub>11</sub> | 18.2                      | 25                                      | 1.6             | 7                      | 1.4                             | 5   |
| [Fe <sub>14</sub> (C <sub>2</sub> H <sub>2</sub> N <sub>3</sub> ) <sub>6</sub> O <sub>6</sub> (OMe) <sub>18</sub> Cl <sub>6</sub> ]·4.5MeOH                                              | 20.3                      | 42.2                                    | 6.0             | 7                      | 2.079                           | 6   |
| Mn(glc) <sub>2</sub>                                                                                                                                                                     | 6.9                       | 13.1                                    | 7.0             | 7                      | 1.898                           | 7   |
| Mn(glc) <sub>2</sub> (H <sub>2</sub> O) <sub>2</sub>                                                                                                                                     | 60.3                      | 112                                     | 1.8             | 7                      | 1.857                           | 7   |
| Mn(Me-ip)(DMF)                                                                                                                                                                           | 42.4                      | 66.7                                    | 3.0             | 8                      | 1.572                           | 8   |
| Cs <sub>2</sub> NaAl <sub>0.38</sub> Cr <sub>0.62</sub> F <sub>6</sub>                                                                                                                   | 16.6                      | 71.7                                    | 3.0             | 10                     | 4.32                            | 9   |
| [CH <sub>3</sub> NH <sub>2</sub> CH <sub>3</sub> ][CrMn(HCOO) <sub>6</sub> ]                                                                                                             | 43.9                      | 74.7                                    | 3.0             | 7                      | 1.702                           | 10  |
| [CH <sub>3</sub> NH <sub>3</sub> ][CrMn(HCOO) <sub>6</sub> ]                                                                                                                             | 48.2                      | 78.5                                    | 3.0             | 7                      | 1.628                           | 10  |



## Reference:

1. J.-P. Zhao, R. Zhao, Q. Yang, B.-W. Hu, F.-C. Liu and X.-H. Bu, *Dalton Trans.*, 2013, **42**, 14509-14515.
2. M. Evangelisti, A. Candini, A. Ghirri, M. Affronte, E. K. Brechin and E. J. L. McInnes, *Applied Physics Letters*, 2005, **87**, 072504.
3. M. Manoli, A. Collins, S. Parsons, A. Candini, M. Evangelisti and E. K. Brechin, *J. Am. Chem. Soc.*, 2008, **130**, 11129-11139.
4. R. Shaw, R. H. Laye, L. F. Jones, D. M. Low, C. Talbot-Eeckelaers, Q. Wei, C. J. Milios, S. Teat, M. Helliwell, J. Raftery, M. Evangelisti, M. Affronte, D. Collison, E. K. Brechin and E. J. L. McInnes, *Inorg. Chem.*, 2007, **46**, 4968-4978.
5. M. Evangelisti, A. Candini, M. Affronte, E. Pasca, L. J. de Jongh, R. T. W. Scott and E. K. Brechin, *Physical Review B*, 2009, **79**, 104414.
6. R. Shaw, R. H. Laye, L. F. Jones, D. M. Low, C. Talbot-Eeckelaers, Q. Wei, C. J. Milios, S. Teat, M. Helliwell and J. Raftery, *Inorg. Chem.*, 2007, **46**, 4968-4978.
7. Y.-C. Chen, F.-S. Guo, J.-L. Liu, J.-D. Leng, P. Vrábel, M. Orendáč, J. Prokleška, V. Sechovský and M.-L. Tong, *Chemistry – A European Journal*, 2014, **20**, 3029-3035.
8. C. B. Tian, R. P. Chen, C. He, W. J. Li, Q. Wei, X. D. Zhang and S. W. Du, *Chemical Communications*, 2014, **50**, 1915-1917.
9. S. Pedro, J. Tedesco, F. Yokaichiya, P. Brandao, A. Gomes, S. Landsgesell, M. Pires, L. Sosman, A. Mansanares and M. Reis, *Physical Review B*, 2014, **90**, 064407.
10. J.-P. Zhao, S.-D. Han, X. Jiang, S.-J. Liu, R. Zhao, Z. Chang and X.-H. Bu, *Chemical Communications*, 2015, **51**, 8288-8291.
